# Supplementary material for: Desaturase-dependent secretory functions of hepatocyte-like cells control systemic lipid metabolism during starvation in Drosophila
Source: Research Square preprint supplement (doi:10.21203/rs.3.rs-5566817/v1), 2024-12-11
Supplement: Supplementary file 1 [file b45c637aeef10442ea120217.docx]

| **Name** | **Reference** |
| --- | --- |
| *w[1118]* | VDRC 60000 |
| *w*; P{UAS-Desat1-RNAi-GD2950} | VDRC 33338 |
| *w*; P{UAS-Desat1-RNAi-KK104350} | VDRC 104350 |
| P{w[+mC]=Desat1-GAL4.E800}2M, P{w[+mC]=tubP-GAL80[ts]}20 | Bloo #65406 |
| P{w[+mC]=Desat1-GAL4.E800}4M, P{w[+mC]=tubP-GAL80[ts]}2 | Bloo #65407 |
| *w*; Desat1 RNAi; PromE-Gal80ts | This work |
| *w*; mCD8-RFP; PromE-Gal80ts | This work |
| *w*; LPR1 RNAi; LPR2 RNAi | This work |
| *w*; UAS-dsRNA LpR1 (KK) | VDRC v106364 |
| *w*; UAS-dsRNA LpR2 (KK) | VDRC v107597 |
| *w*; LPR2 RNAi/CyO GFP; PromE gal80ts/TM6b Tb | This work |
| *w*; LPR1 RNAi/CyO GFP; PromE gal80ts/TM6b Tb | This work |
| PromE gal80ts, CyO-GFP; Apolpp-GFP, TM6B, Tb | This work |
| P[mw, UAS-mCD8-RFP]/(CyO) | Bellaiche Lab |
| *y, w*; P[mw, UAS-mCD8-GFP] | Bloo #5137 |
| *y[1], w[*]*; UAS-albumin-mCherry | This work |
| *w*;; Lpp-gal4 | Lemaitre Lab |
| y[1] v[1]; P{y[+t7.7] v[+t1.8]=TRiP.UAS-apolppp RNAi}attP2 | Bloo #28946 |
| y[1] v[1]; P{y[+t7.7] v[+t1.8]=TRiP UAS-LIMK1-RNAi}attP40 | Bloo #42576 |
| y[1] sc[*] v[1] sev[21]; P{y[+t7.7] v[+t1.8]=TRiP UAS-tsr-RNAi}attP2 | Bloo #65055 |
| y[1] w[*]; P{w[+mC]=UAS-tsr.N}2.2.1/TM6B, P{y[+t7.7] ry[+t7.2]=Car20y}TPN1, Tb[1] | Bloo #9235 |
| *w*; P[mw, UAS-Rab5-RNAi]KK103945 | VDRC v103945 |
| FlyFos027263(pRedFlp-Hgr)(Rfabg30509::2XTY1-SGFP-V5-preTEV-BLRP-3XFLAG)dFRT | VDRC v318255 |
| ;; UAS-ImpL2-HA OE | Perrimon Lab |
| *w*; P[mw, UAS-daw-RNAi] | VDRC v5085 |
| *w*; P[mw, UAS-ImpL2-RNAi] | VDRC 30930 |
| *w*; P[mw, UAS-daw-RNAi]; PromE gal80ts | This work |
|  |  |

**Supplementary Table 1: Fly stocks**
