# Supplementary material for: Desaturase-dependent secretory functions of hepatocyte-like cells control systemic lipid metabolism during starvation in Drosophila
Source: Research Square preprint supplement (doi:10.21203/rs.3.rs-5566817/v1), 2024-12-11
Supplement: Supplementary file 1 [file efdb73ad7a7d2e764033df86.pdf]

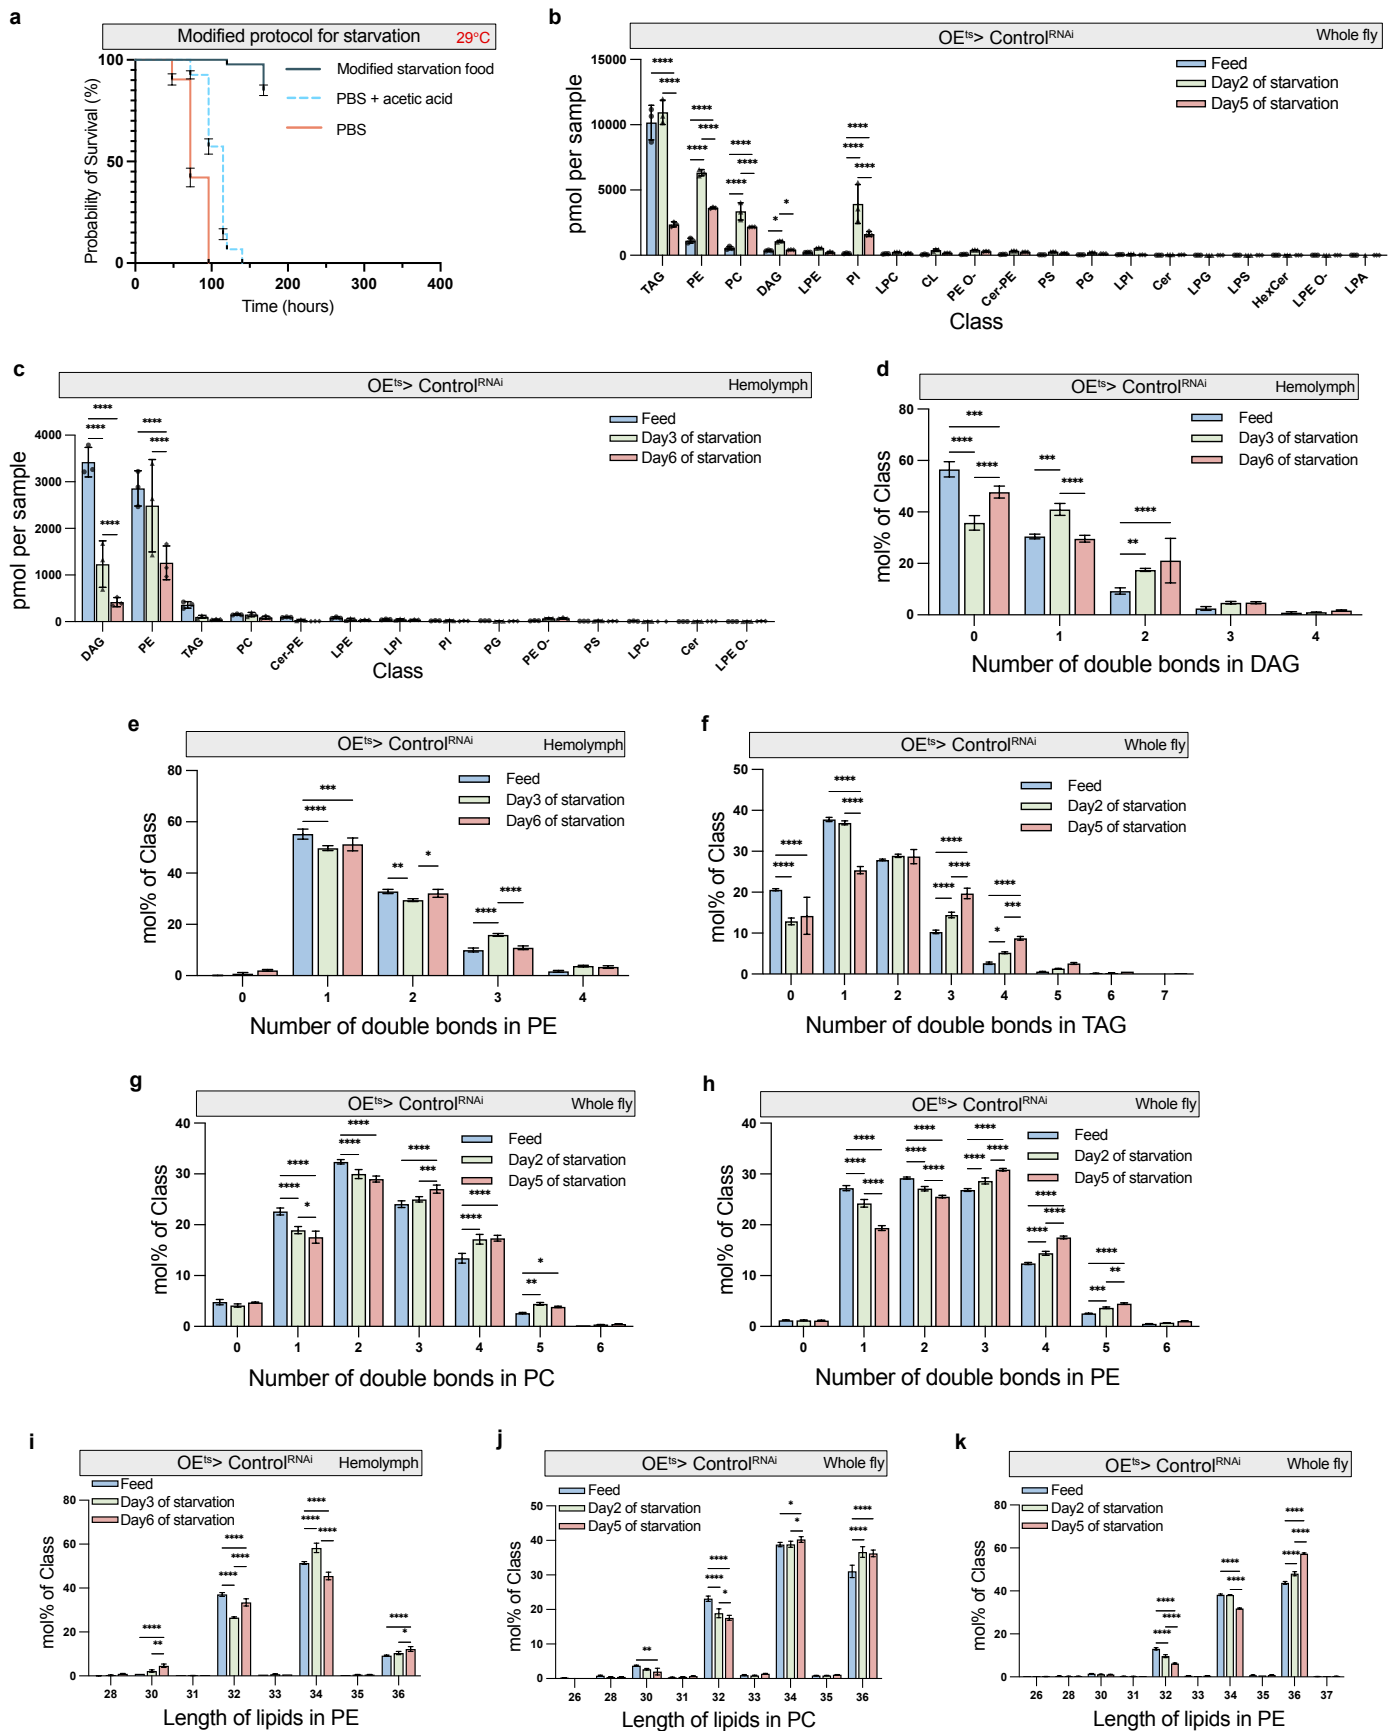

**Extended data Fig. 1: Lipidomic analysis of hemolymph or whole fly sample at different days of starvation**

**a**, Comparison of modified starvation protocol (incl. acetic acid supplementation) and normal PBS starvation protocol plus acetic acid supplementation. N=180. **b,c**, Quantitative lipidomic analysis of hemolymph or whole fly samples. Error bars indicate standard deviation, n=3. Statistical tests: two-way ANOVA with Tukey's multiple comparisons test. **d-h**, The number of double bonds in different major lipid classes in hemolymph or whole samples. DAG, diglyceride; TAG, triglyceride; PE, phosphatidyl ethanolamine; PC, phosphatidylcholine. n=3, statistical tests: two-way ANOVA with Tukey's multiple comparisons test. **i-k**, length of lipids in different lipid classes, n=3, statistical tests: two-way ANOVA with Tukey's multiple comparisons test. \*, P< 0.05; \*\*, P<0.01; \*\*\*, P<0.001; \*\*\*\*, P<0.0001.

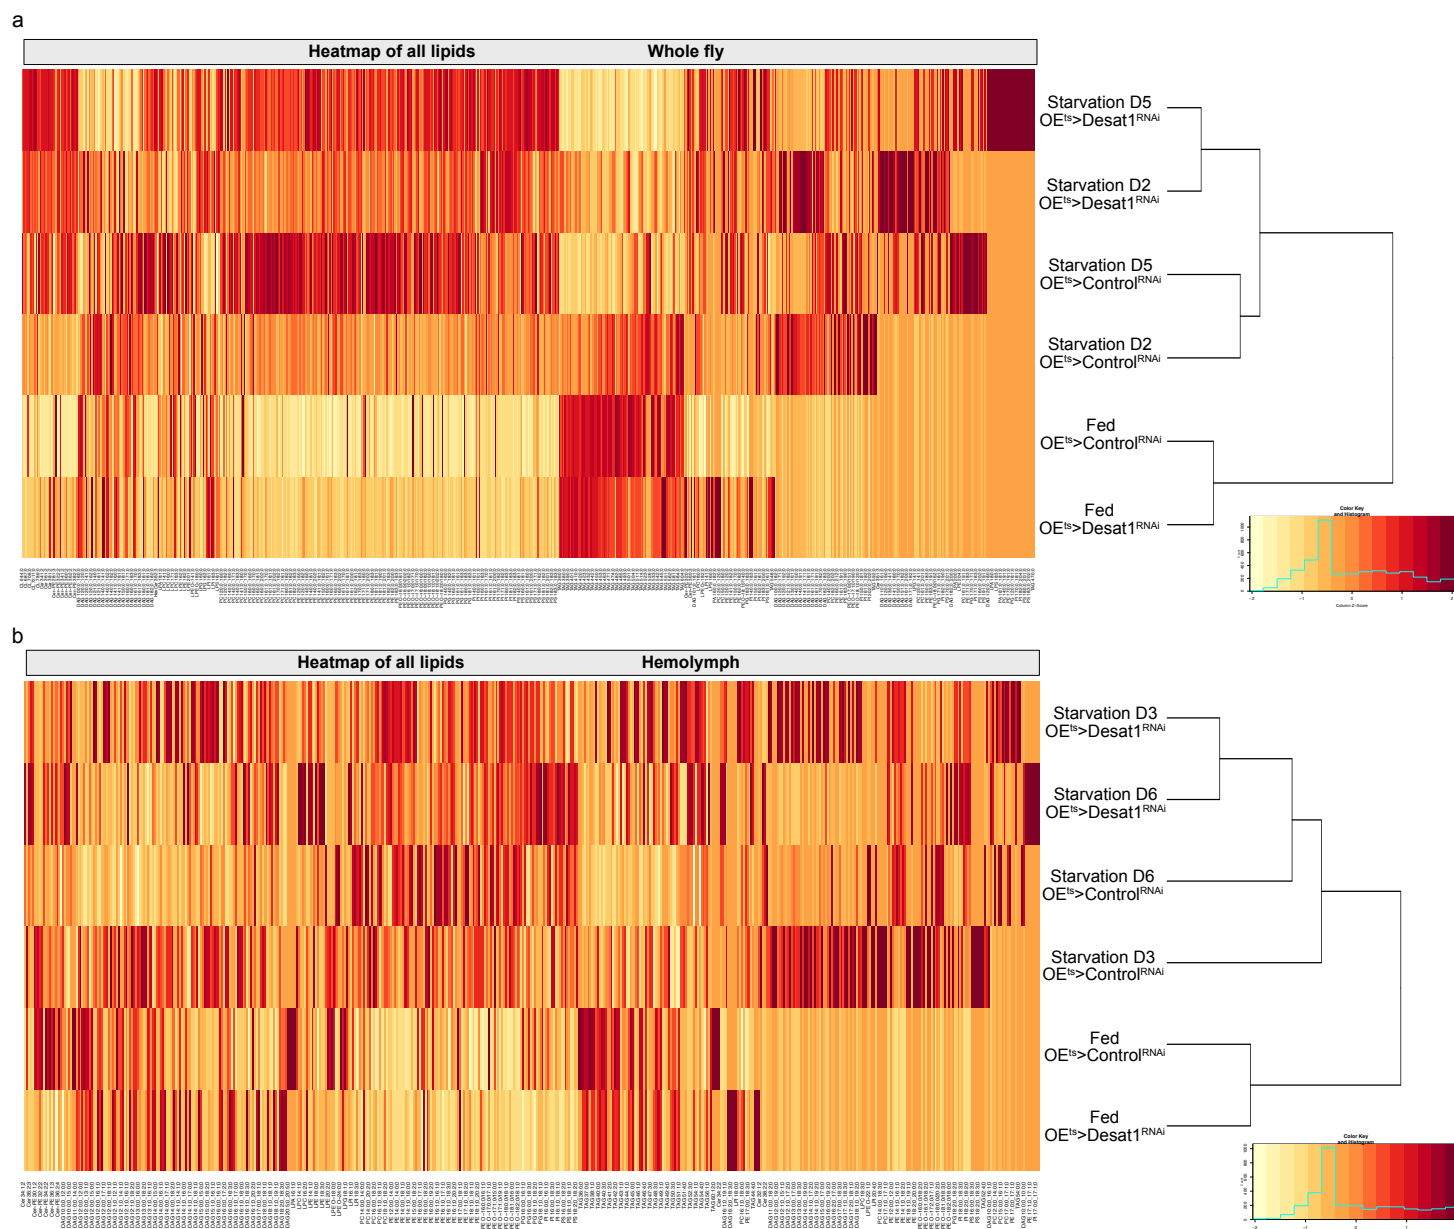

## Extended Data Fig. 2: Lipidomics heatmap

Heatmap from whole-fly and hemolymph lipidomic profiles in starvation and fed conditions, n=3.

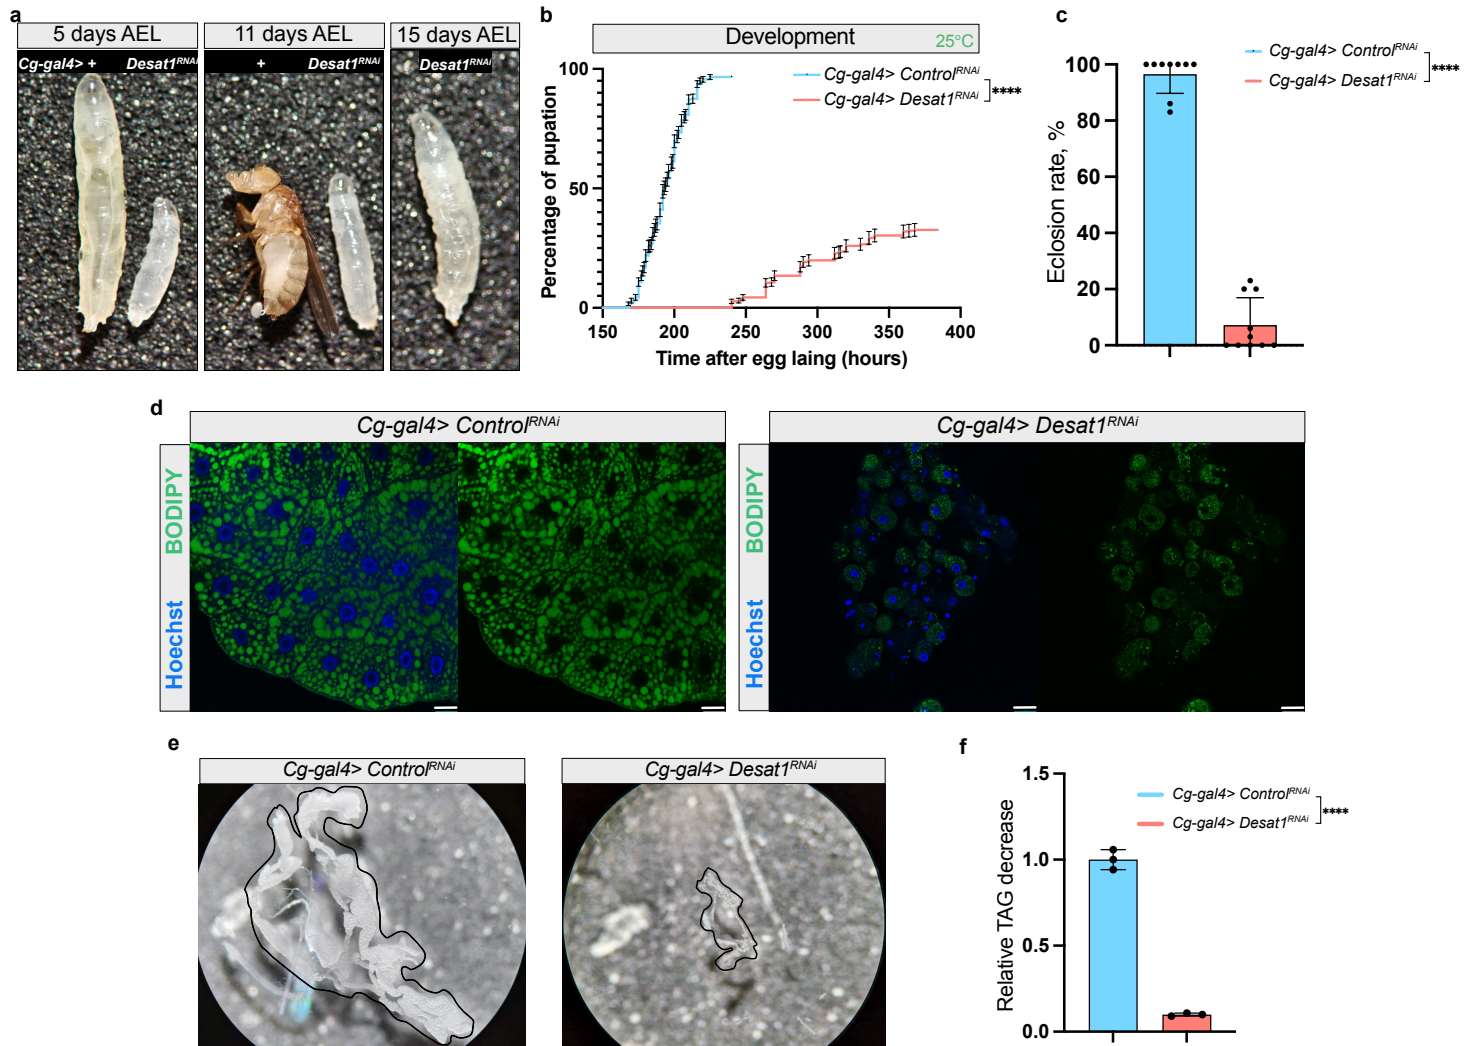

### Extended Data Fig. 3 Role of Desat1 in the fat body

**a**, Representative images of flies at different development stages. Flies with fat body (FB)-specific *Desat1* KD showed a strong development delay,  $n > 4$ . **b,c**, Percentage of pupation and eclosion of control or FB *Desat1* KD group,  $n = 9$ . **d**, Representative images of FB LDs stained by BODIPY in control or *Desat1* KD group,  $n = 3$ , scale bars: 20  $\mu\text{m}$ . **e**, Representative images of FB morphology in control or FB *Desat1* KD group. Black lines mark the FB. **f**, TAG level of whole larva measured by TAG kit,  $N = 3$ . Statistical tests: unpaired t test. AEL, after egg laying, scale bars: 20  $\mu\text{m}$ .



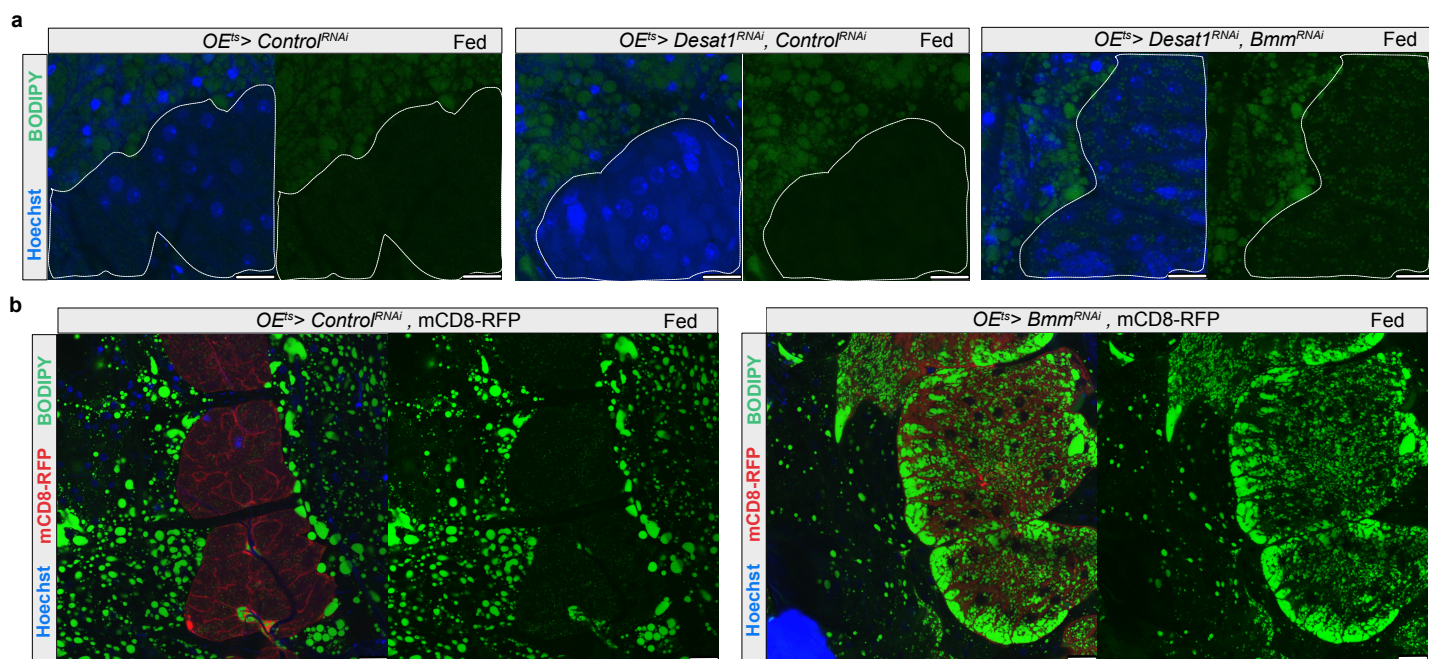

#### Extended Data Fig. 4 Role of Bmm in oenocytes

**a, b,** Representative images of LDs stained by BODIPY in control, *Bmm* KD or *Desat1/Bmm* KD groups.  $n=3$ , mCD8-RFP expression marks oenocytes (white dashed lines), scale bars: 20  $\mu\text{m}$ .

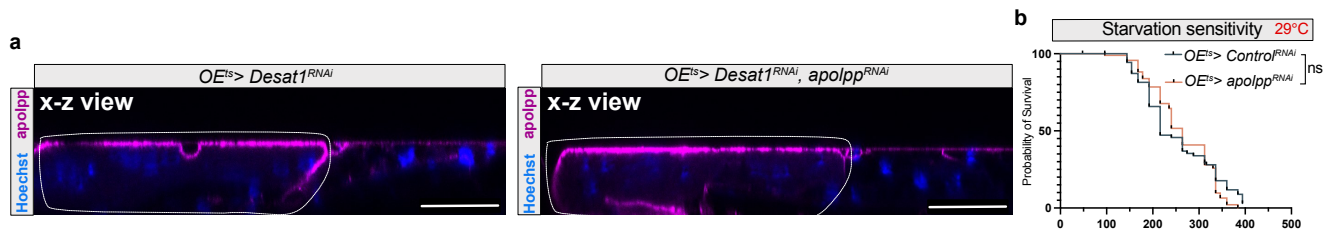

### Extended Data Fig. 5 Lpp accumulated in oenocytes is from hemolymph

**a**, Representative x-z side view images of apolpp in *Desat1* KD and *Desat1/apolpp* KD group with dashed white lines marking the oenocytes, scale bars: 20  $\mu$ m. **b**, Starvation sensitivity assay between control and *apolpp* KD groups at 29 °C. N=80, P value was calculated using Log-rank (Mantel-Cox) test. Note that expression of the same *apolpp* RNAi in FB led to developmental arrest (our own data and ref 34), demonstrating functionality of the RNAi.

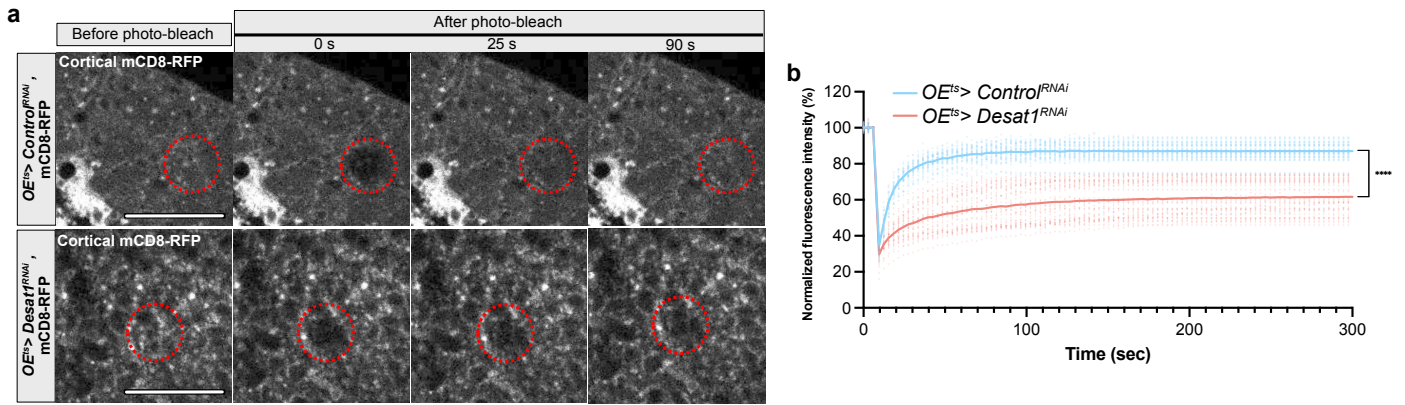

### Extended Data Fig. 6 Diffusion of mCD8-RFP on oenocyte surface is restricted upon *Desat1* KD

**a**, Fluorescence recovery after photobleaching (FRAP) of surface mCD8-RFP shows impaired diffusion in oenocytes with *Desat1* KD compared to controls. Red dashed lines show the region of photo-bleaching on the oenocyte surface, scale bar: 10  $\mu$ m. **b**, The intensity of fluorescence is plotted over time. The dip at 10 seconds reflects the photobleaching event. \*\*\*\* $P < 0.0001$ , *OE<sup>ts</sup> > Desat1<sup>RNAi</sup>* vs. *OE<sup>ts</sup> > Control<sup>RNAi</sup>*,  $n = 35$ , each data point represented a FRAP experiment performed in a cell surface. Statistical tests: two-way ANOVA.

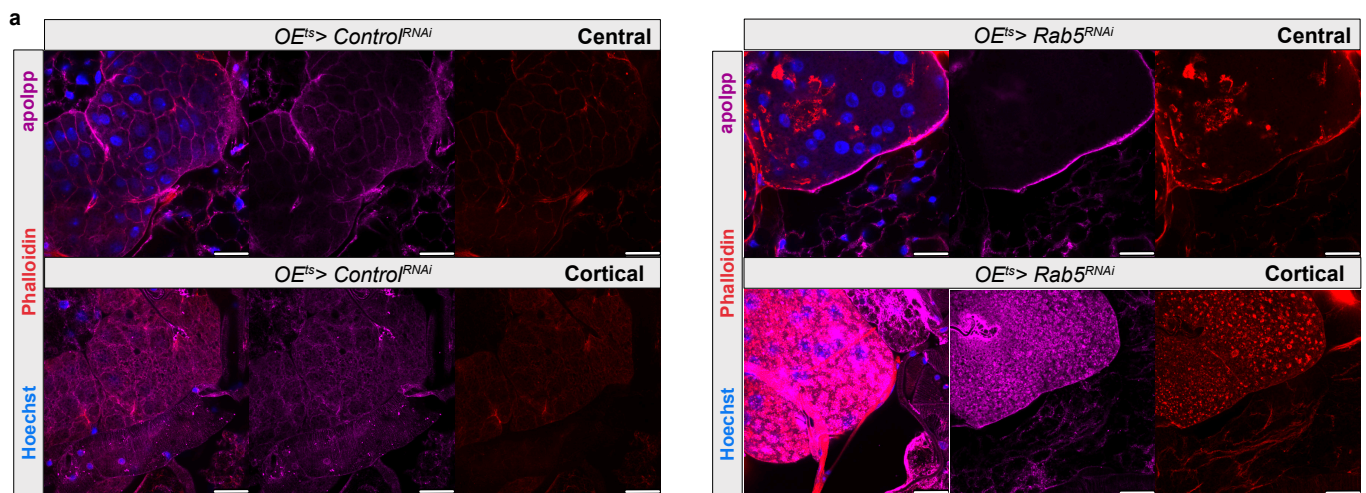

**Extended data Fig. 7 Rab5 silencing leads to apolpp and actin accumulation in oenocytes**

**a**, Representative images of apolpp and phalloidin of central and cortical sections in control and Rab5 KD groups,  $n=3$ , scale bars: 20  $\mu m$ .

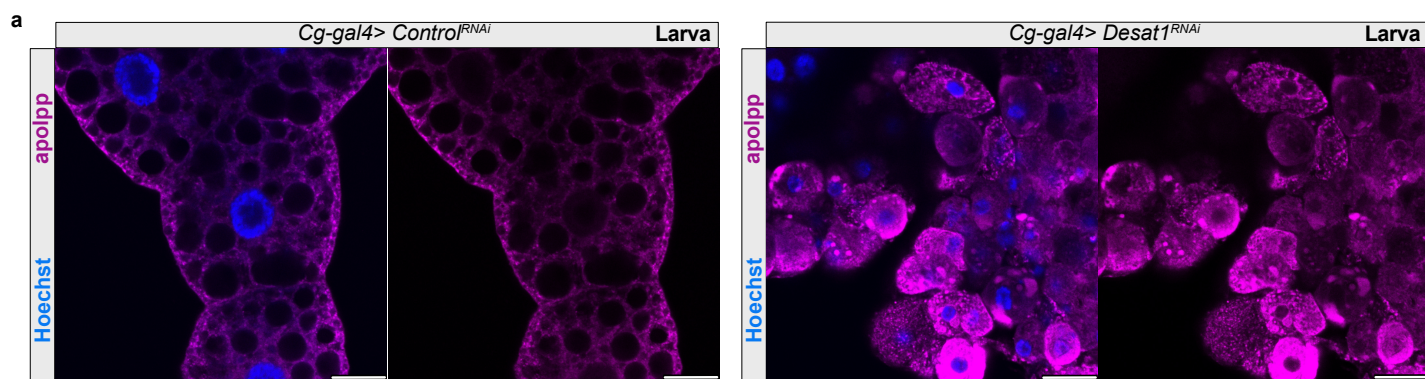

**Extended Data Fig. 8 Apolpp secretion in fat body with *Desat1* deficiency**

**a**, Representative fat body images of apolpp in larva, n=2, scale bars: 20μm.

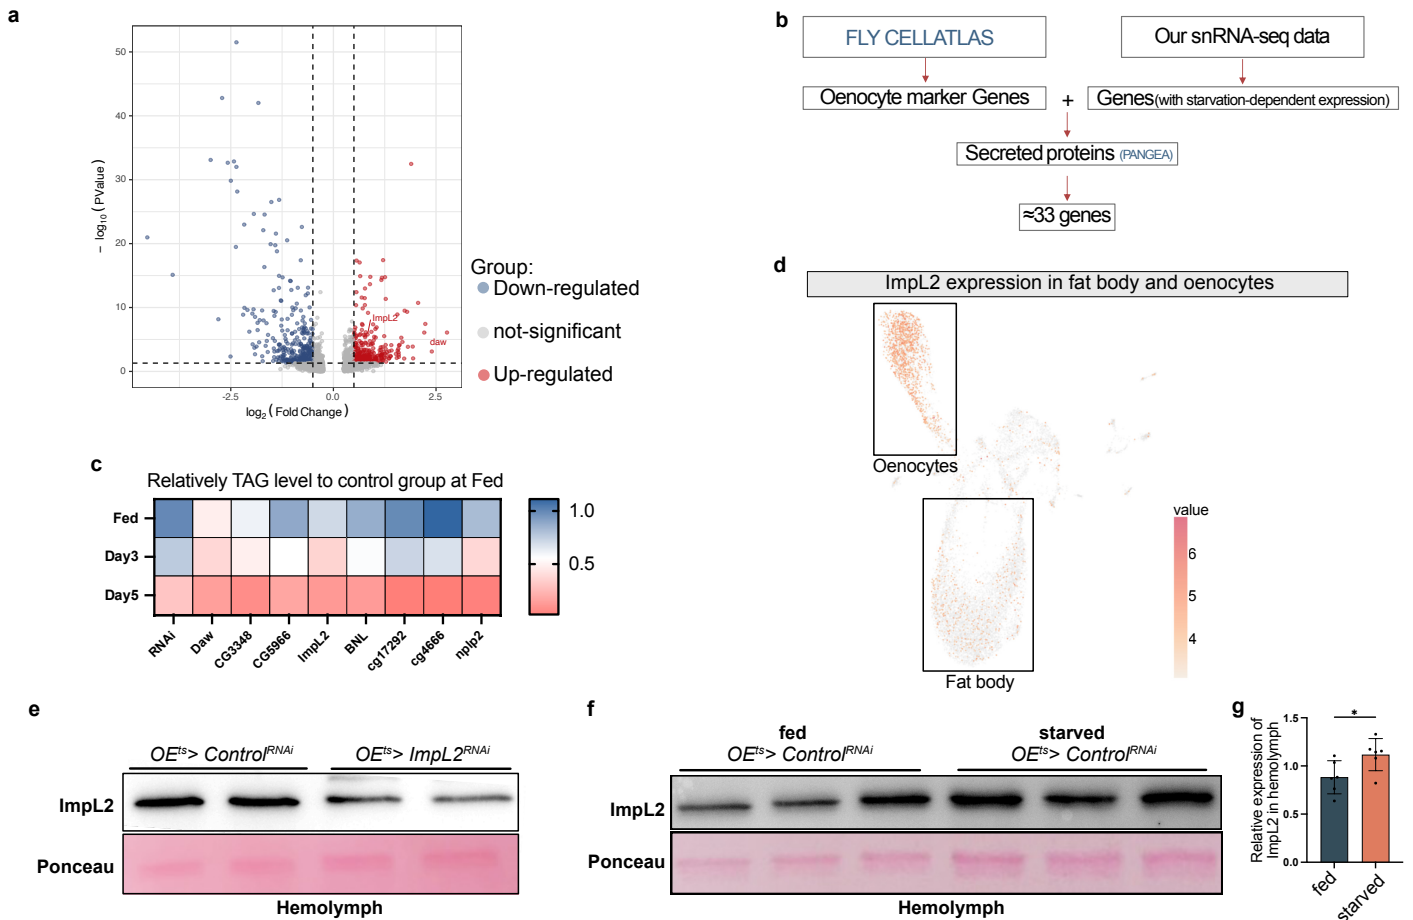

### Extended Data Fig. 9 Impl2 secretion by oenocytes is increased in starvation

**a**, Differentially expressed genes in oenocytes (day 2 of starvation vs. fed condition) were visualized using a volcano map (Fold change >0.5 and P value < 0.05). **b**, A protocol of gene selection. **c**, Relative TAG level measured by kit from whole flies with different candidate gene KD specifically in oenocytes, n=4. **d**, *Impl2* expression pattern from DRSC RNA-seq explorer showed a high expression level of *Impl2* in oenocytes compared with fat body. **e**, Western blot analysis of Impl2 level in hemolymph from control or *OE<sup>ts</sup>>Impl2<sup>RNAi</sup>* flies, n=2. **f**, Western blot analysis of Impl2 at fed or starvation condition in hemolymph. **g**, Quantification of Impl2 level in hemolymph in fed or starvation condition, n=3, statistical tests: unpaired t test, \*p<0.05.
